# Supplementary material
Source: publisher figshare collection journal article supplement (https://acs.figshare.com/ndownloader/files/4458877)
Supplement: Supplementary file 1 [file 4458877]

*Supporting Information*

Synthesis and Photophysical Properties of 2-Donor-7-acceptor-9-silafluorenes: Remarkable Fluorescence Solvatochromism and Highly Efficient Fluorescence in Doped Polymer Films

Masaki Shimizu,\* Kenji Mochida, Masaki Katoh, and Tamejiro Hiyama

*Department of Material Chemistry, Graduate School of Engineering, Kyoto University,  
Kyoto University Katsura, Nishikyo-ku, Kyoto 615-8510, Japan*

*E-mail: m.shimizu@hs2.ecs.kyoto-u.ac.jp*

**General Information**

Melting points were determined using a Stanford Research Systems MPA100.  $^1\text{H}$  NMR spectra measured on a Varian Mercury 300 (300 MHz) and 400 (400 MHz) spectrometers. The chemical shifts of  $^1\text{H}$  NMR are expressed in parts per million downfield relative to the internal tetramethylsilane ( $\delta = 0$  ppm) or chloroform ( $\delta = 7.26$  ppm). Splitting patterns are indicated as s, singlet; d, doublet; t, triplet; q, quartet; hep, heptet; m, multiplet.  $^{13}\text{C}$  NMR spectra were measured on a Varian Mercury 300 (75 MHz) and 400 (100 MHz) spectrometers with tetramethylsilane as an internal standard ( $\delta = 0$  ppm) or chloroform-*d* ( $\delta = 77.0$  ppm).  $^{19}\text{F}$  NMR spectra were measured on a Varian Mercury 300 (282 MHz) spectrometer with  $\text{CFCl}_3$  as an internal standard ( $\delta = 0$  ppm). Chemical shift values are given in parts per million downfield relative to the internal standards. Infrared spectra (IR) were recorded on a Shimadzu FTIR-8400 spectrometer. EI-MS analyses were performed with a JEOL JMS-700 spectrometer by electron ionization at 70 eV. FAB-MS analyses were performed with a JEOL-HX110A spectrometer. Elemental analyses were carried out with a YANAKO MT2 CHN CORDER machine at Elemental Analysis Center of Kyoto University. TLC analyses were performed by means of Merck Kieselgel 60  $\text{F}_{254}$ . Silica gel column chromatography was carried out using Merck Kieselgel 60 (230–400 mesh). Dichlorodiisopropylsilane was purchased from Tokyo Chemical Industry Co., Ltd. Dimethylacetamide (DMA) was purchased from Wako, Inc. Reagent-grade dichloromethane, diethyl ether, and tetrahydrofuran were passed through two packed columns of neutral alumina and copper oxide under a nitrogen atmosphere before use. All reactions were carried out under an argon atmosphere.

## General Procedure for Preparation of 2-(3-Aminophenylsilyl)aryl triflates 6-8

2-(Arylsilyl)aryl triflates **6-8** were prepared according to the following scheme.

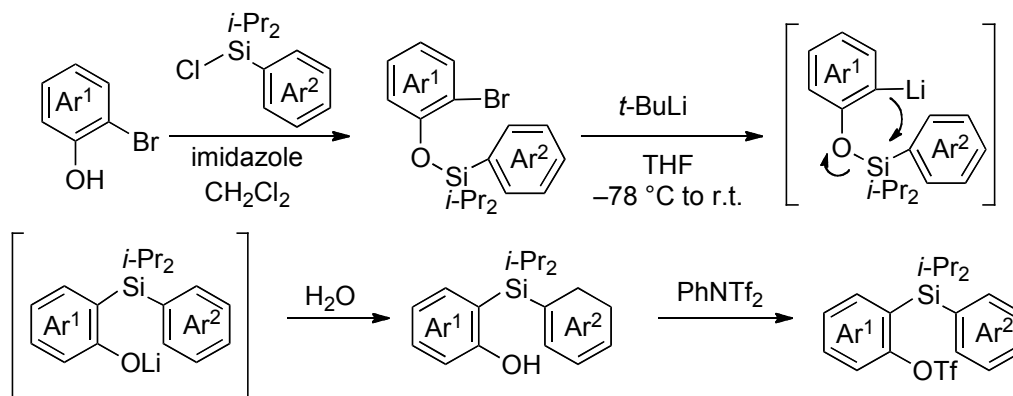

### Silylation of phenols with chlorosilanes:

2-(Arylsilyl)phenols were prepared by silylation of the corresponding 2-bromophenols with chloro(diisopropylaryl)silane, followed by retro-Brook rearrangement of the silyl ethers in a manner similar to those reported in the following reference.

Shimizu, M.; Mochida, K.; Hiyama, T. *Angew. Chem. Int. Ed.* **2008**, 47, 9760.

### Triflation of 2-silylphenols:

An oven-dried 20-mL Schlenk tube equipped with a magnetic stir bar and a rubber septum was charged with NaH (72 mg, 3 mmol) and DMF (5 mL). A DMF solution (5 mL) of 2-(3-aminophenylsilyl)phenol (3 mmol) was added to the suspension of NaH dropwise at room temperature. The resulting solution was stirred at room temperature for 1 h and then PhNTf<sub>2</sub> (1.07 g, 3 mmol) was added to the solution. The mixture was stirred for 12 h before quenching with saturated aq. NH<sub>4</sub>Cl (20 mL). The aqueous layer was extracted with hexane (20 mL × 3). The combined organic layer was washed with saturated aq. NaCl (15 mL), dried over anhydrous MgSO<sub>4</sub>, and concentrated by rotary evaporation. The residue was purified by column chromatography on silica gel to 2-(3-aminophenylsilyl)aryl triflates **6-8** as a colorless liquid or solid.

### 2-[(3-Dimethylaminophenyl)diisopropylsilyl]phenyl trifluoromethanesulfonate (**6**)

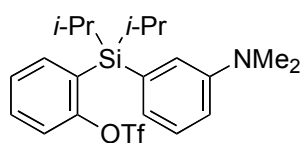

Purification: silica gel column chromatography (hexane/AcOEt 10:1) followed by GPC (CHCl<sub>3</sub>). Yield: 21%, colorless oil. TLC: R<sub>f</sub> 0.43 (hexane/AcOEt 10:1). <sup>1</sup>H NMR (400 MHz, CDCl<sub>3</sub>): δ 0.98 (d, *J* = 7.3 Hz, 6H), 1.07 (d, *J* = 7.5 Hz, 6H), 1.73 (qq, *J* = 7.5, 7.3 Hz, 2H), 2.93 (s, 6H), 6.79–6.90 (m, 3H), 7.25–7.29 (m, 2H), 7.42 (dd, *J* = 8.4, 0.9 Hz, 1H), 7.47–7.52 (m, 2H); <sup>13</sup>C NMR (100 MHz, CDCl<sub>3</sub>): δ 10.7, 17.98, 18.00, 40.8, 113.7, 118.3 (q, *J* = 319.8 Hz), 118.5, 120.1, 124.4, 126.2, 126.3, 128.1, 131.2, 132.4, 139.7, 149.5, 156.2; <sup>19</sup>F NMR (282 MHz, CDCl<sub>3</sub>): δ –74.9. IR (neat): ν = 2947, 2866, 1587, 1420, 1213, 1142, 1053, 991, 893, 777, 766, 745, 598, 513 cm<sup>–1</sup>. MS (FAB) *m/z*: 459 (100, M<sup>+</sup>), 416 (15), 348 (4). Anal. Calcd for C<sub>21</sub>H<sub>28</sub>F<sub>3</sub>NO<sub>3</sub>SSi: C, 54.88; H, 6.14. Found: C, 54.78; H, 6.12.

**2-[(3-Dimethylaminophenyl)diisopropylsilyl]-4-trifluoromethylphenyl trifluoromethanesulfonate (7)**

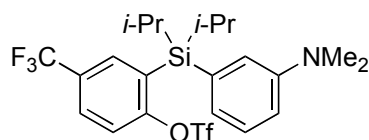

Purification: silica gel column chromatography (hexane/AcOEt 10:1). Yield: 17%, colorless oil. TLC: R<sub>f</sub> 0.48 (hexane/AcOEt 10:1). <sup>1</sup>H NMR (400 MHz, CDCl<sub>3</sub>): δ 0.98 (d, *J* = 7.3 Hz, 6H), 1.05 (d, *J* = 7.5 Hz, 6H), 1.75 (qq, *J* = 7.5, 7.3 Hz, 2H), 2.93 (s, 6H), 6.79–6.82 (m, 3H), 7.26–7.30 (m, 1H), 7.55 (d, *J* = 8.8 Hz, 1H), 7.74 (dd, *J* = 8.8, 2.2 Hz, 1H), 7.80 (d, *J* = 1.8 Hz, 1H); <sup>13</sup>C NMR (100 MHz, CDCl<sub>3</sub>): δ 10.7, 17.7, 17.9, 40.8, 114.3, 118.3 (q, *J* = 319.5 Hz), 118.8, 119.9, 123.4 (q, *J* = 272.0 Hz), 124.3, 128.3, 128.4, 128.5 (q, *J* = 4.6 Hz), 128.7 (q, *J* = 32.7 Hz), 131.3, 136.5 (q, *J* = 3.1 Hz), 149.6, 157.9; <sup>19</sup>F NMR (282 MHz, CDCl<sub>3</sub>): δ –62.9, –74.6. IR (neat): ν = 2946, 2868, 1589, 1493, 1425, 1327, 1217, 1136, 1057, 885, 824, 725, 610 cm<sup>–1</sup>. MS (FAB) *m/z*: 527 (100, M<sup>+</sup>), 484 (8), 350 (13). Anal. Calcd for C<sub>22</sub>H<sub>27</sub>F<sub>6</sub>NO<sub>3</sub>SSi: C, 50.08; H, 5.16. Found: C, 49.92; H, 5.02.

**4-Cyano-2-[(3-dimethylaminophenyl)diisopropylsilyl]phenyl trifluoromethanesulfonate (8a)**

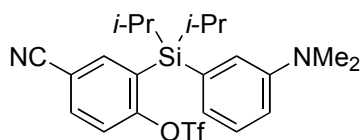

Purification: silica gel column chromatography (hexane/AcOEt 10:1). Yield: 42%, a colorless oil. TLC: R<sub>f</sub> 0.25 (hexane/AcOEt 10:1). <sup>1</sup>H NMR (400 MHz, CDCl<sub>3</sub>): δ 0.99 (d, *J* = 7.3 Hz, 6H), 1.06 (d, *J* = 7.3 Hz, 6H), 1.73 (qq, *J* = 7.3, 7.3 Hz, 2H), 2.95 (s, 6H), 6.79–6.86 (m, 3H), 7.29 (d, *J* = 8.6

Hz, 1H), 7.56 (d,  $J = 8.6$  Hz, 1H), 7.76–7.80 (m, 2H);  $^{13}\text{C}$  NMR (100 MHz,  $\text{CDCl}_3$ ):  $\delta$  10.7, 17.9, 40.6, 111.0, 114.1, 117.5, 118.2 (q,  $J = 319.8$  Hz), 119.3, 119.4, 123.8, 128.6, 129.5, 130.7, 134.9, 143.3, 149.7, 158.0;  $^{19}\text{F}$  NMR (282 MHz,  $\text{CDCl}_3$ ):  $\delta$  -74.4. IR (neat):  $\nu = 2949, 2868, 2234, 1587, 1566, 1495, 1408, 1348, 1284, 1211, 1138, 1057, 991, 887, 844, 777, 682, 617\text{ cm}^{-1}$ . MS (FAB)  $m/z$ : 484 (100,  $\text{M}^+$ ), 441 (5), 351 (5). Anal. Calcd for  $\text{C}_{22}\text{H}_{27}\text{F}_3\text{N}_2\text{O}_3\text{SSi}$ : C, 54.53; H, 5.62. Found: C, 54.53; H, 5.50.

#### 4-Cyano-2-[(3-diphenylaminophenyl)diisopropylsilyl]phenyl trifluoromethanesulfonate (8b)

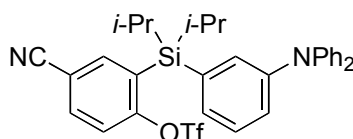

Purification: silica gel column chromatography (hexane/AcOEt 10:1). Yield: 19%, a colorless solid. Mp: 151.9–152.9 °C. TLC:  $R_f$  0.25 (hexane/AcOEt 10:1).  $^1\text{H}$  NMR (400 MHz,  $\text{CDCl}_3$ ):  $\delta$  0.92 (d,  $J = 7.6$  Hz, 6H), 0.97 (d,  $J = 7.6$  Hz, 6H), 1.63 (qq,  $J = 7.6, 7.6$  Hz, 2H), 6.98–7.05 (m, 3H), 7.08–7.10 (m, 4H), 7.13–7.16 (m, 2H), 7.22–7.30 (m, 5H), 7.52 (d,  $J = 8.6$  Hz, 1H), 7.72 (d,  $J = 2.2$  Hz, 1H), 7.76 (dd,  $J = 8.6, 2.2$  Hz, 1H);  $^{13}\text{C}$  NMR (100 MHz,  $\text{CDCl}_3$ ):  $\delta$  10.4, 17.7, 17.8, 111.1, 117.6, 119.4, 119.8 (q,  $J = 317.2$  Hz), 122.7, 124.0, 125.6, 128.9, 129.0, 129.1, 129.5, 130.7, 131.6, 135.0 (2C), 142.9, 147.4, 157.9;  $^{19}\text{F}$  NMR (282 MHz,  $\text{CDCl}_3$ ):  $\delta$  -74.4. IR (KBr):  $\nu = 2953, 2926, 1587, 1493, 1422, 1273, 1213, 1140, 891, 844, 754, 696, 619\text{ cm}^{-1}$ . MS (FAB)  $m/z$ : 608 (37,  $\text{M}^+$ ), 565 (1), 475 (1). Anal. Calcd for  $\text{C}_{32}\text{H}_{31}\text{F}_3\text{N}_2\text{O}_3\text{SSi}$ : C, 63.14; H, 5.13. Found: C, 62.87; H, 5.13.

#### Preparation of 2-dimethylamino-7-trifluoromethyl-9,9-diethylfluorene (9)

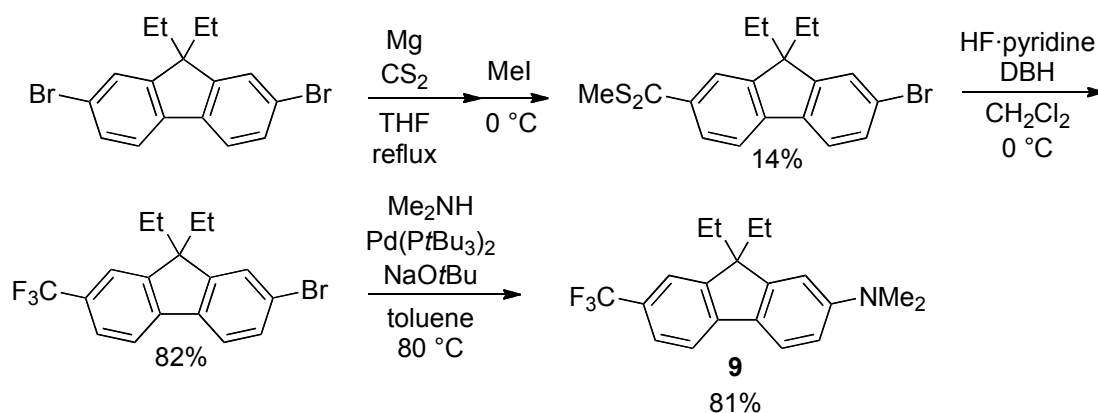

An oven-dried 20 mL Schlenk tube equipped with a magnetic stir bar and a rubber septum was charged with magnesium turnings (0.16 g, 6.5 mmol) and THF (2 mL). To the vigorously

stirred suspension was added 1,2-dibromoethane (43  $\mu$ L, 0.5 mmol) dropwise. A small portion of 2,7-dibromo-9,9-diethylfluorene (CAS: 197969-58-7) was added to initiate the reaction. After color of the reaction mixture turned pale orange, the remaining solution of 2,7-dibromo-9,9-diethylfluorene (totally, 1.9 g, 5.0 mmol) in THF (3 mL) was added. The reaction mixture was stirred at room temperature for 6 h before quenching carbon disulfide (0.93 mL, 15.5 mmol). The mixture was further stirred at room temperature for 12 h before methyl iodide (0.47 mL, 7.5 mmol) was added dropwise to the reaction mixture at 0 °C. The resulting mixture was stirred at room temperature for 5 h, then diluted with  $\text{CH}_2\text{Cl}_2$  (10 mL). Saturated aq.  $\text{NH}_4\text{Cl}$  (5 mL) was added to the solution and the aqueous layer was extracted with  $\text{CH}_2\text{Cl}_2$  (20 mL  $\times$  3). The combined organic layer was washed with  $\text{H}_2\text{O}$  (15 mL  $\times$  3) and saturated aq.  $\text{NaCl}$  (15 mL), dried over anhydrous  $\text{MgSO}_4$ , and concentrated under reduced pressure. The residue was purified by column chromatography on silica gel (hexane) to give methyl 7-(dimethylamino)-9,9-dithylfluorene-2-carbodithioate (0.26 g, 0.69 mmol, 14%) as a red oil. A 5 mL polyethylene vial equipped with a magnetic stir bar was charged with 7-(dimethylamino)-9,9-dithylfluorene-2-carbodithioate (0.26 g, 0.69 mmol), 1,3-dibromo-5,5-dimethylhydantoin (0.79 g, 2.8 mmol), and  $\text{CH}_2\text{Cl}_2$  (2 mL). To the solution was added HF/Py (70/30 wt%, 0.3 mL,  $\text{F}^-$ : 20 mmol) dropwise at 0 °C. The reaction mixture was stirred at room temperature for 1 h, then poured into an aqueous solution of sodium hydrogencarbonate and sodium hydrogensulfite, and the aqueous layer was extracted with  $\text{CH}_2\text{Cl}_2$  (20 mL  $\times$  3). The combined organic layer was washed with  $\text{H}_2\text{O}$  (15 mL  $\times$  3) and saturated aq.  $\text{NaCl}$  (15 mL) and dried over anhydrous  $\text{MgSO}_4$  and concentrated under reduced pressure. The residue was purified by column chromatography on silica gel (hexane) to give 2-bromo-7-trifluoromethyl-9,9-diethylfluorene (0.21 g, 0.57 mmol, 82%) as a colorless solid. An oven-dried 3 mL vial equipped with a magnetic stir bar was charged with 2-bromo-7-trifluoromethyl-9,9-diethylfluorene (0.21 g, 0.57 mmol), dimethylamine (50 wt% in  $\text{H}_2\text{O}$ , 0.23 mL, 4.6 mmol),  $\text{Pd}(\text{P}t\text{Bu}_3)_2$  (31 mg, 0.06 mmol),  $\text{NaOtBu}$  (0.22 g, 2.3 mmol), and toluene (2 mL). The mixture was heated at 80 °C for 20 h. The resulting mixture was cooled to room temperature and diluted with  $\text{CH}_2\text{Cl}_2$  (10 mL). Saturated aq.  $\text{NH}_4\text{Cl}$  (5 mL) was added to the solution and the aqueous layer was extracted with  $\text{CH}_2\text{Cl}_2$  (20 mL  $\times$  3). The combined organic layer was washed with  $\text{H}_2\text{O}$  (15 mL  $\times$  3) and saturated aq.  $\text{NaCl}$  (15 mL), and dried over anhydrous  $\text{MgSO}_4$ , and concentrated under reduced pressure. The residue was purified by column chromatography on silica gel (hexane/AcOEt 50:1) to give 2-dimethylamino-7-trifluoromethyl-9,9-diethylfluorene (**9**, 0.15 g, 0.46 mmol, 81 %) as a colorless solid. Mp: 80.1–81.0 °C.  $R_f$  0.05 (hexane).  $^1\text{H}$  NMR (400 MHz,  $\text{CDCl}_3$ ):  $\delta$  0.32–0.35 (m, 6H), 1.93–2.09 (m, 4H), 3.05 (s, 6H), 6.64 (d,  $J$  = 2.4 Hz, 1H), 6.73 (dd,  $J$  = 8.4, 2.4 Hz, 1H), 7.46–7.47

(m, 1H), 7.52 (dm,  $J = 7.9$  Hz, 1H), 7.59 (d,  $J = 8.4$  Hz, 1H), 7.60 (d,  $J = 7.9$  Hz, 1H);  $^{13}\text{C}$  NMR (100 MHz,  $\text{CDCl}_3$ ):  $\delta$  8.6, 33.0, 40.9, 56.3, 106.4, 111.3, 117.8, 119.1 (q,  $J = 3.1$  Hz), 120.9, 124.0 (q,  $J = 3.8$  Hz), 124.9 (q,  $J = 271.9$  Hz), 125.0 (q,  $J = 31.2$  Hz), 128.9, 145.6, 149.1, 151.0, 152.1. IR (KBr):  $\nu = 2965, 2911, 2359, 1608, 1506, 1361, 1325, 1314, 1161, 1109, 1062, 842, 810, 739$   $\text{cm}^{-1}$ . MS (FAB)  $m/z$ : 333 (100,  $\text{M}^+$ ), 308 (3), 288 (6). Anal. Calcd for  $\text{C}_{20}\text{H}_{22}\text{F}_3\text{N}$ : C, 72.05; H, 6.65. Found: C, 72.04; H, 6.65.

### Preparation of 2-dimethylamino-7-formyl-9,9-diethylfluorene (**10**)

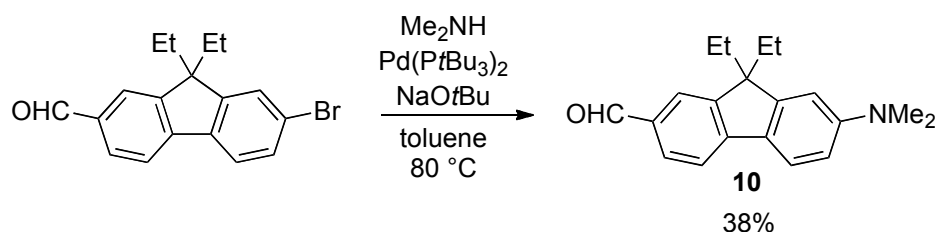

An oven-dried 3 mL vial equipped with a magnetic stir bar was charged with 2-bromo-7-formyl-9,9-diethylfluorene (CAS: 225113-39-3, 82 mg, 0.25 mmol), dimethylamine (50 wt% in  $\text{H}_2\text{O}$ , 0.1 mL, 2.0 mmol),  $\text{Pd(PtBu}_3)_2$  (13 mg, 0.025 mmol),  $\text{NaOtBu}$  (96 mg, 1.0 mmol), and toluene (2 mL). The mixture was heated at  $80^\circ\text{C}$  for 20 h. The resulting mixture was cooled to room temperature and diluted with  $\text{CH}_2\text{Cl}_2$  (10 mL). Saturated aq.  $\text{NH}_4\text{Cl}$  (5 mL) was added to the solution and the aqueous layer was extracted with  $\text{CH}_2\text{Cl}_2$  (20 mL  $\times$  3). The combined organic layer was washed with  $\text{H}_2\text{O}$  (15 mL  $\times$  3) and saturated aq.  $\text{NaCl}$  (15 mL), dried over anhydrous  $\text{MgSO}_4$ , and concentrated under reduced pressure. The residue was purified by column chromatography on silica gel (hexane/ $\text{AcOEt}$  10:1) to give 2-dimethylamino-7-formyl-9,9-diethylfluorene (**10**, 28 mg, 0.1 mmol, 38 %) as a yellow solid. Mp:  $126.7\text{--}127.4^\circ\text{C}$ .  $R_f$  0.10 (hexane/ $\text{AcOEt}$  10:1).  $^1\text{H}$  NMR (400 MHz,  $\text{CDCl}_3$ ):  $\delta$  0.31–0.34 (m, 6H), 1.93–2.13 (m, 4H), 6.63 (m, 1H), 6.73 (d,  $J = 7.7$  Hz, 1H), 7.61–7.66 (m, 2H), 7.77–7.79 (m, 2H);  $^{13}\text{C}$  NMR (100 MHz,  $\text{CDCl}_3$ ):  $\delta$  8.6, 33.0, 40.8, 56.1, 106.1, 111.4, 117.9, 121.7 (2C), 122.5, 131.1, 133.3, 149.0, 149.4, 151.4, 153.2, 192.0. IR (KBr):  $\nu = 2959, 2816, 1678, 1589, 1506, 1361, 1296, 1166, 1076, 800, 743, 680$   $\text{cm}^{-1}$ . MS (FAB)  $m/z$ : 293 (54,  $\text{M}^+$ ), 264 (2), 248 (3). Anal. Calcd for  $\text{C}_{20}\text{H}_{23}\text{NO}$ : C, 81.87; H, 7.90. Found: C, 81.83; H, 7.98.

### Preparation of 2-(2,2-dicyanoethenyl)-9,9-diethyl-7-dimethylaminofluorene (**11**)

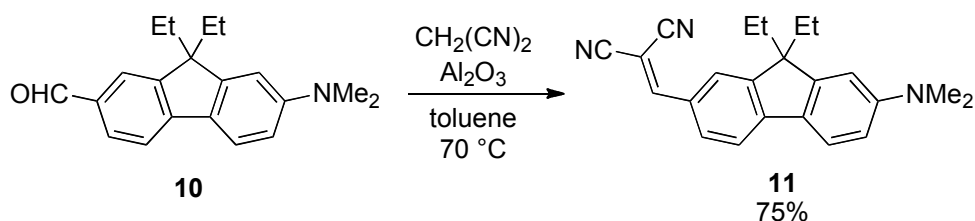

An oven-dried 3 mL vial equipped with a magnetic stir bar was charged with **10** (26 mg, 0.09 mmol), malononitrile (12 mg, 0.18 mmol), basic  $\text{Al}_2\text{O}_3$  (47 mg), and toluene (1 mL). The reaction mixture was stirred at 70 °C for 20 h. The resulting mixture was cooled to room temperature and diluted with  $\text{CH}_2\text{Cl}_2$  (10 mL). Saturated aq.  $\text{NH}_4\text{Cl}$  (5 mL) was added to the solution and the aqueous layer was extracted with  $\text{CH}_2\text{Cl}_2$  (20 mL  $\times$  3). The combined organic layer was washed with  $\text{H}_2\text{O}$  (15 mL  $\times$  3) and saturated aq. NaCl (15 mL), dried over anhydrous  $\text{MgSO}_4$ , and concentrated under reduced pressure. The residue was purified by recrystallization from hexane/ $\text{CH}_2\text{Cl}_2$  to give 2-(2,2-dicyanoethenyl)-9,9-diethyl-7-dimethylaminofluorene (**11**, 23 mg, 75%) as a red solid. Mp: 160.4–161.4 °C. TLC:  $R_f$  0.28 (hexane/AcOEt 2.5:1).  $^1\text{H}$  NMR (400 MHz,  $\text{CDCl}_3$ ):  $\delta$  0.33–0.37 (m, 6H), 1.93–2.11 (m, 4H), 6.60 (d,  $J$  = 2.1 Hz, 1H), 6.73 (dd,  $J$  = 8.6, 2.1 Hz, 1H), 7.61 (d,  $J$  = 8.0 Hz, 1H), 7.62 (d,  $J$  = 8.6 Hz, 1H), 7.72 (s, 1H), 7.78 (dd,  $J$  = 8.0, 1.6 Hz, 1H), 7.88 (d,  $J$  = 1.6 Hz, 1H);  $^{13}\text{C}$  NMR (100 MHz,  $\text{CDCl}_3$ ):  $\delta$  8.6, 32.9, 40.7, 56.2, 77.4, 105.7, 111.5, 113.9, 114.9, 118.4, 122.2, 124.1, 127.5, 128.1, 131.9, 149.8, 149.9, 151.8, 153.9, 159.6. IR (KBr):  $\nu$  = 2959, 2850, 2222, 1566, 1541, 1431, 1357, 1301, 1219, 1182, 1082, 808, 744  $\text{cm}^{-1}$ . MS (FAB)  $m/z$ : 341 (6,  $\text{M}^+$ ), 242 (1), 176 (4). Anal. Calcd for  $\text{C}_{23}\text{H}_{23}\text{N}_3$ : C, 80.90; H, 6.79. Found: C, 80.60; H, 6.82.

**Crystallographic data of 3b.**

CCDC–768341 contains the supplementary crystallographic data for **3b**.

|                                   |                                                   |                               |
|-----------------------------------|---------------------------------------------------|-------------------------------|
| Empirical formula                 | C <sub>31</sub> H <sub>30</sub> N <sub>2</sub> Si |                               |
| Formula weight                    | 458.66                                            |                               |
| Temperature                       | 300(2) K                                          |                               |
| Wavelength                        | 0.71073 Å                                         |                               |
| Crystal system                    | Monoclinic                                        |                               |
| Space group                       | P2(1)/n                                           |                               |
| Unit cell dimensions              | a = 8.4497(7) Å                                   | $\alpha = 90^\circ$ .         |
|                                   | b = 13.2197(10) Å                                 | $\beta = 95.9840(10)^\circ$ . |
|                                   | c = 23.800(2) Å                                   | $\gamma = 90^\circ$ .         |
| Volume                            | 2644.0(4) Å <sup>3</sup>                          |                               |
| Z                                 | 4                                                 |                               |
| Density (calculated)              | 1.152 Mg/m <sup>3</sup>                           |                               |
| Absorption coefficient            | 0.110 mm <sup>-1</sup>                            |                               |
| F(000)                            | 976                                               |                               |
| Crystal size                      | 0.50 x 0.50 x 0.50 mm <sup>3</sup>                |                               |
| Theta range for data collection   | 1.72 to 25.50°.                                   |                               |
| Index ranges                      | -7 ≤ h ≤ 10, -16 ≤ k ≤ 14, -26 ≤ l ≤ 28           |                               |
| Reflections collected             | 14091                                             |                               |
| Independent reflections           | 4890 [R(int) = 0.0179]                            |                               |
| Completeness to theta = 25.50°    | 99.6 %                                            |                               |
| Absorption correction             | Empirical                                         |                               |
| Max. and min. transmission        | 0.9472 and 0.9472                                 |                               |
| Refinement method                 | Full-matrix least-squares on F <sup>2</sup>       |                               |
| Data / restraints / parameters    | 4890 / 24 / 311                                   |                               |
| Goodness-of-fit on F <sup>2</sup> | 1.100                                             |                               |
| Final R indices [I > 2σ(I)]       | R1 = 0.0724, wR2 = 0.2307                         |                               |
| R indices (all data)              | R1 = 0.0845, wR2 = 0.2492                         |                               |
| Largest diff. peak and hole       | 1.026 and -0.506 e.Å <sup>-3</sup>                |                               |



UV absorption and fluorescence spectra of 1–5 in various solvents (Spectra measured in benzene are omitted for clarity.)

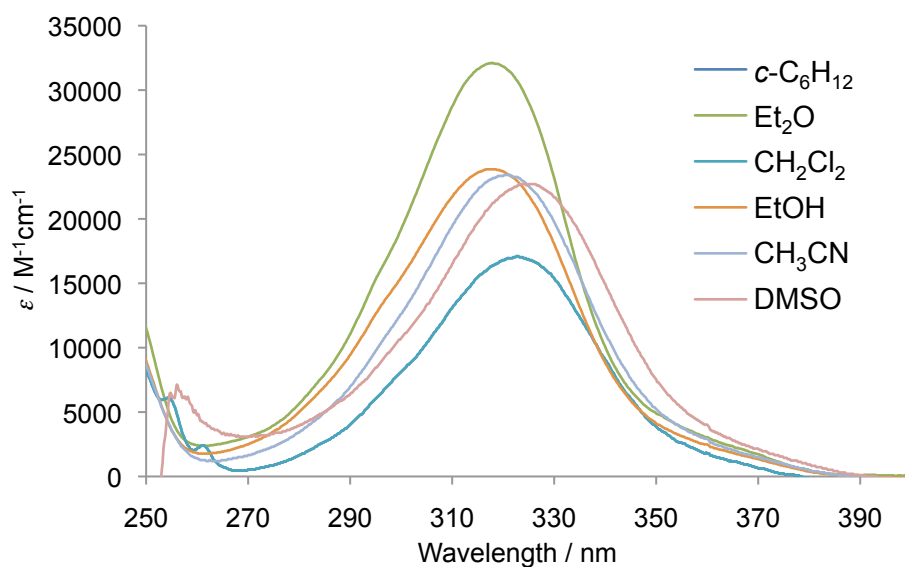

Figure S1. UV absorption spectra of 1 in various solvents.

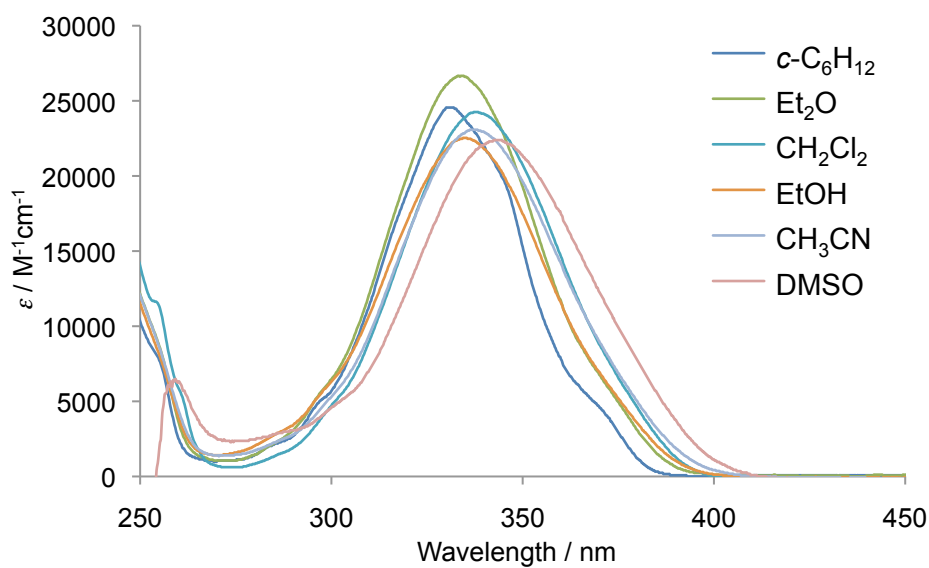

Figure S2. UV absorption spectra of 2 in various solvents.

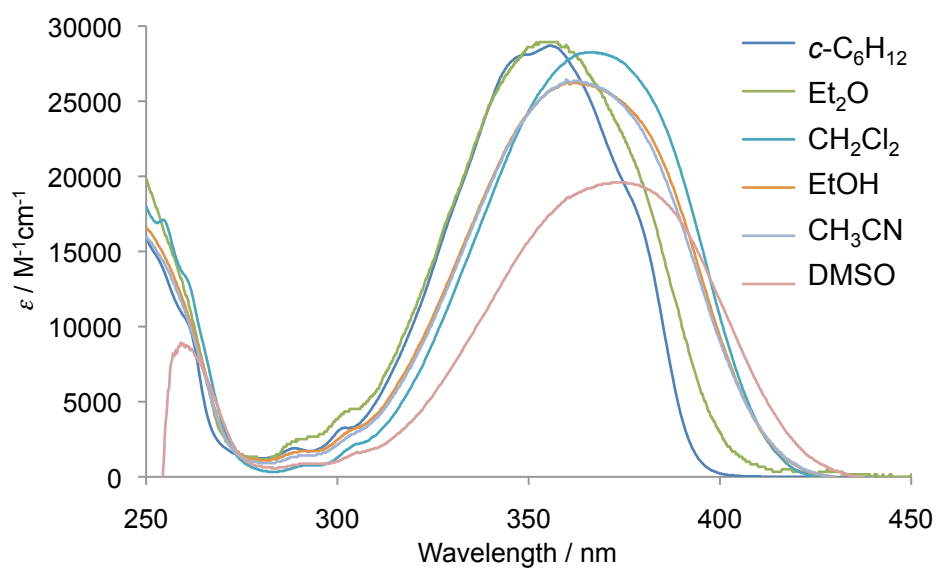

**Figure S3.** UV absorption spectra of 3a in various solvents.

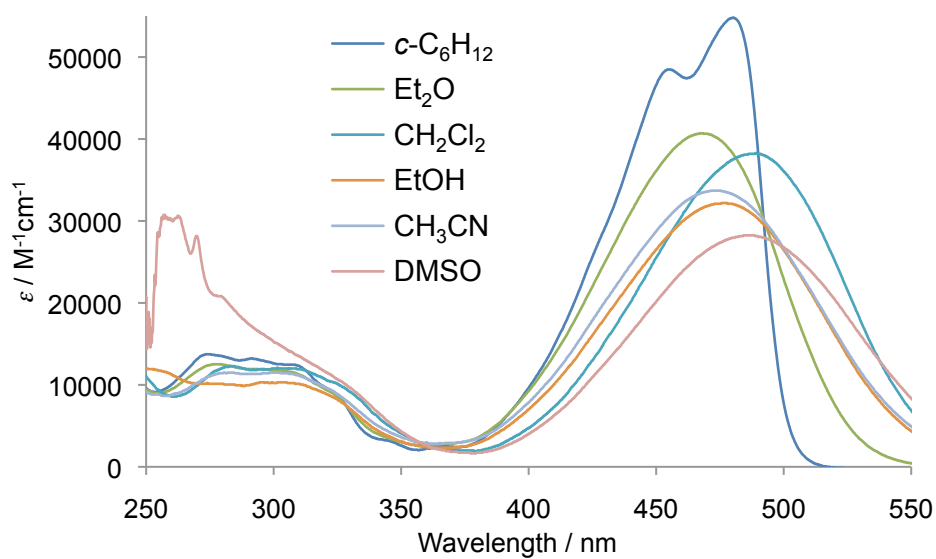

**Figure S4.** UV absorption spectra of 5a in various solvents.

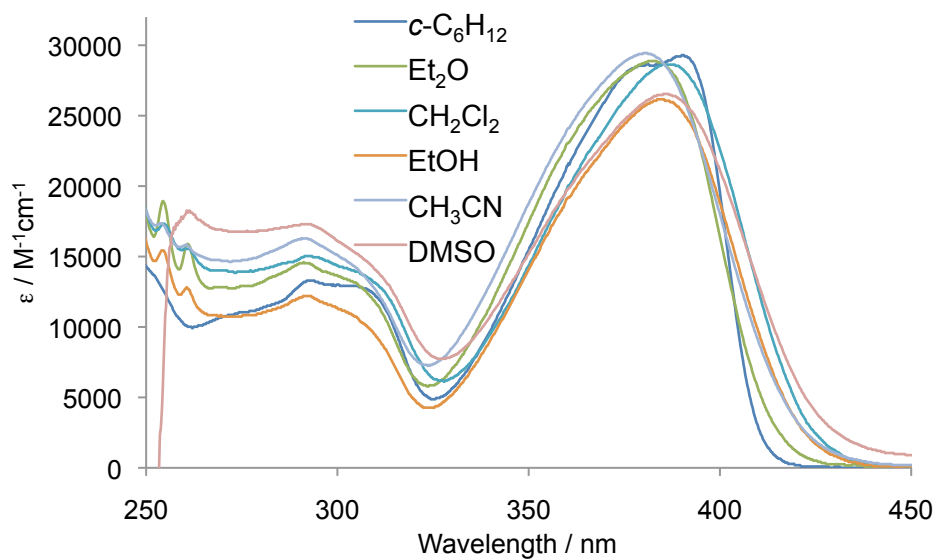

**Figure S5.** UV absorption spectra of 3b in various solvents.

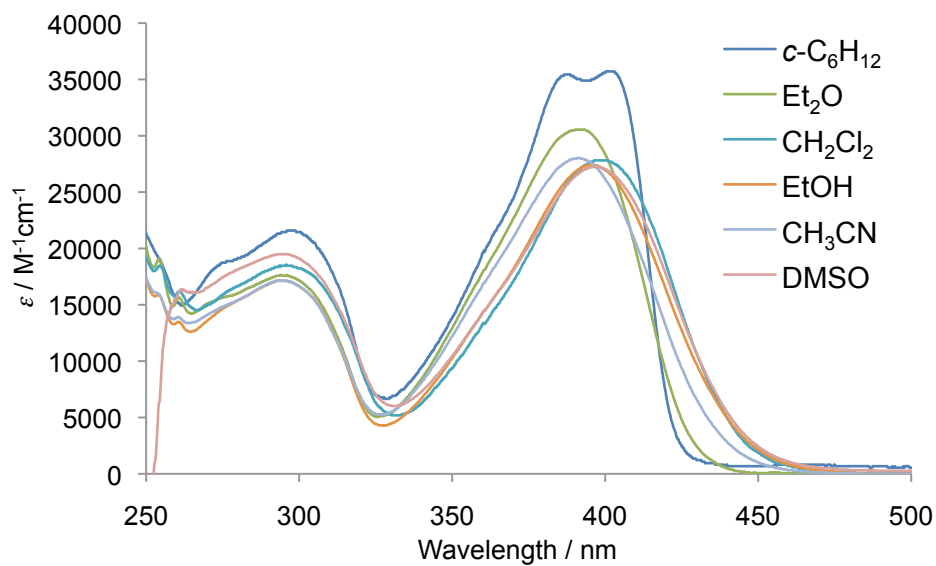

**Figure S6.** UV absorption spectra of 4b in various solvents.

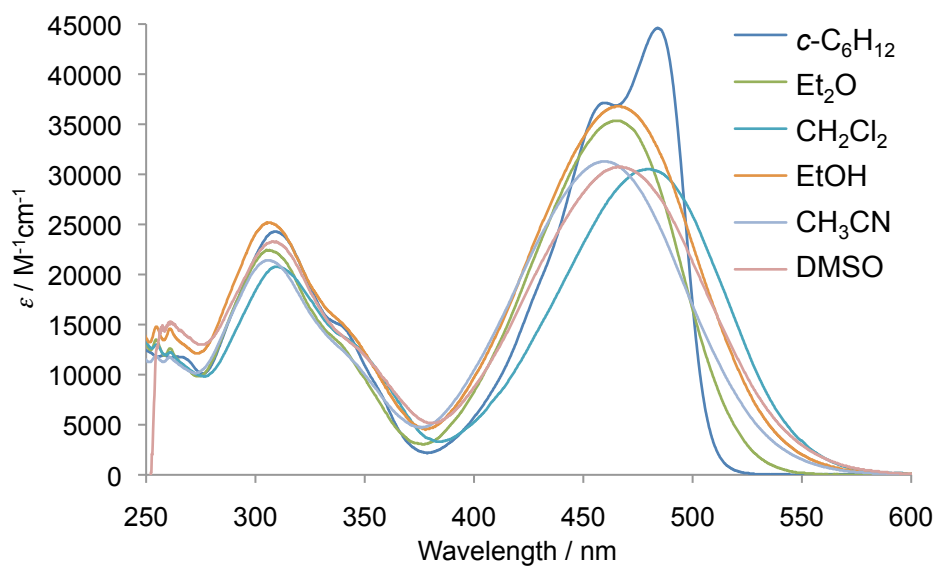

**Figure S7.** UV absorption spectra of 5b in various solvents.

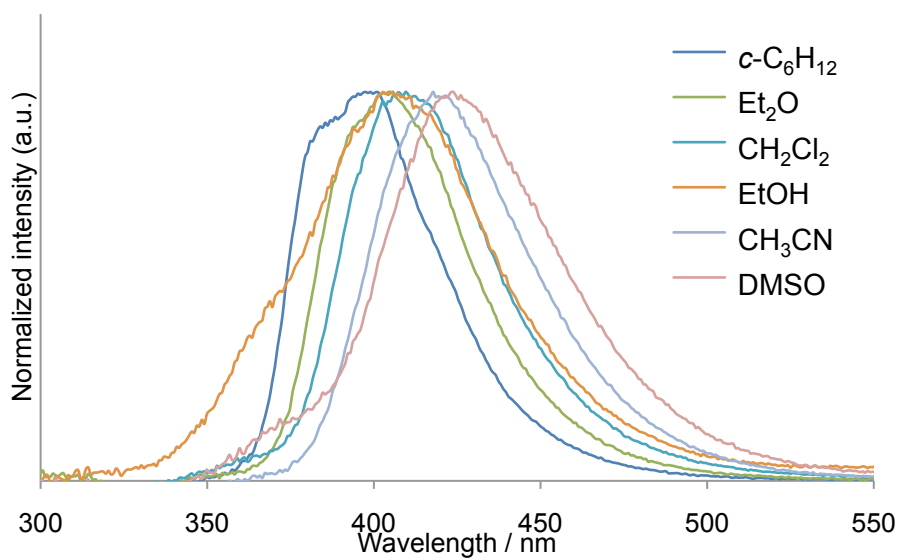

**Figure S8.** Fluorescence spectra of 1 in various solvents ( $\lambda_{\text{ex}} = 290 \text{ nm}$ ).

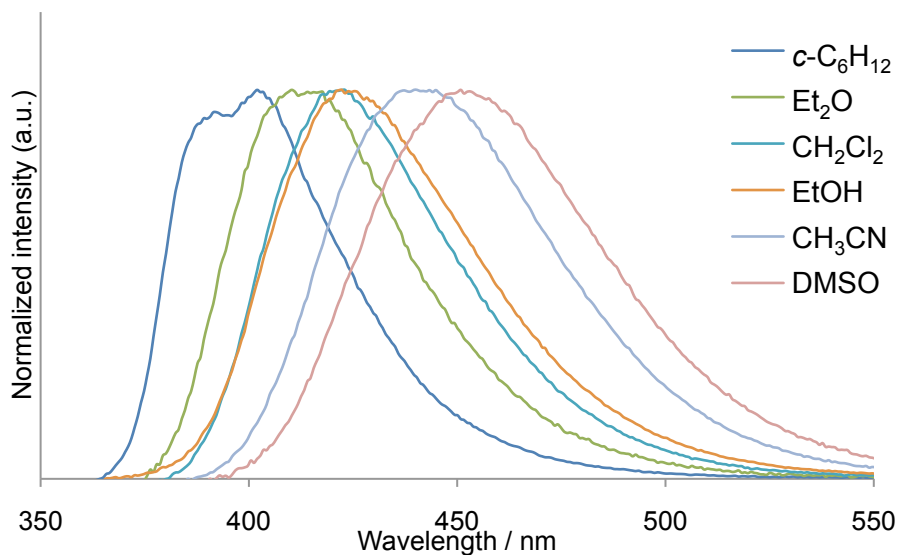

**Figure S9.** Fluorescence spectra of **2** in various solvents ( $\lambda_{\text{ex}} = 290 \text{ nm}$ ).

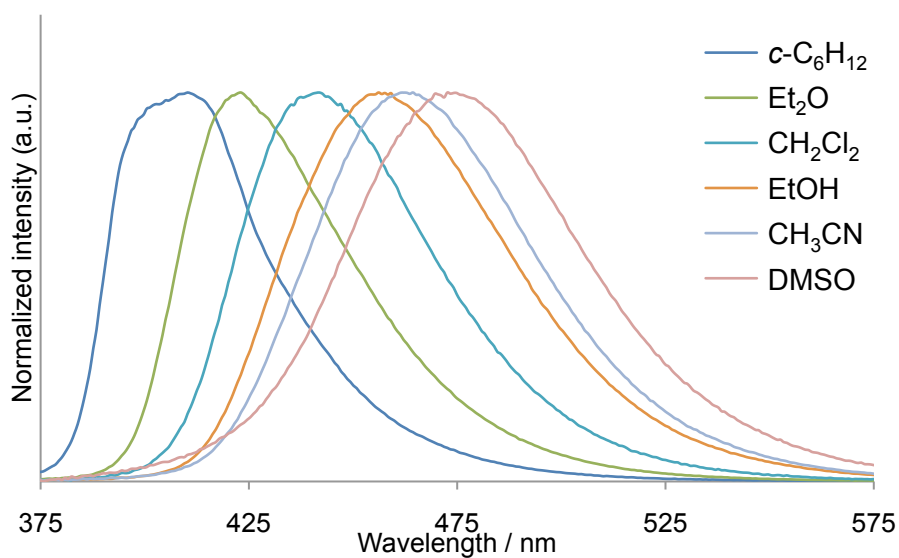

**Figure S10.** Fluorescence spectra of **3a** in various solvents ( $\lambda_{\text{ex}} = 320 \text{ nm}$ ).

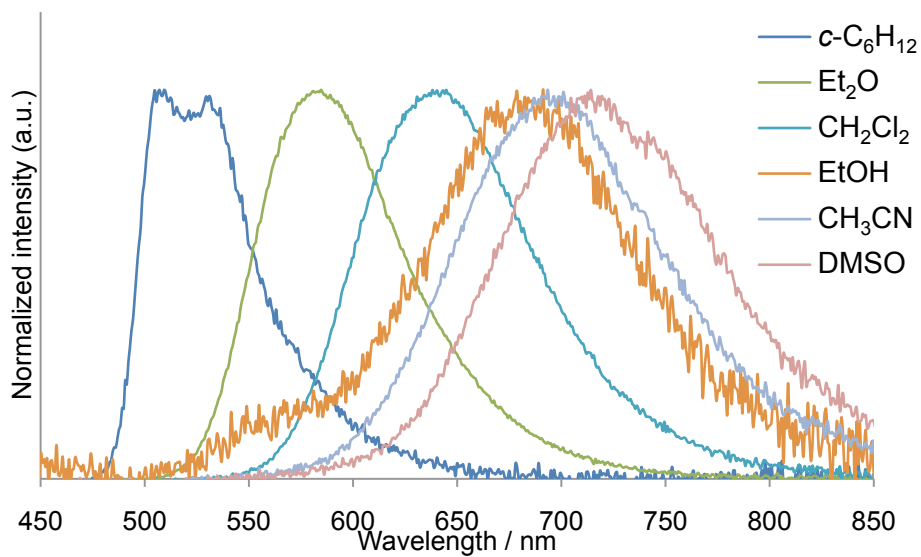

**Figure S11.** Fluorescence spectra of 5a in various solvents ( $\lambda_{\text{ex}} = 390 \text{ nm}$ ).

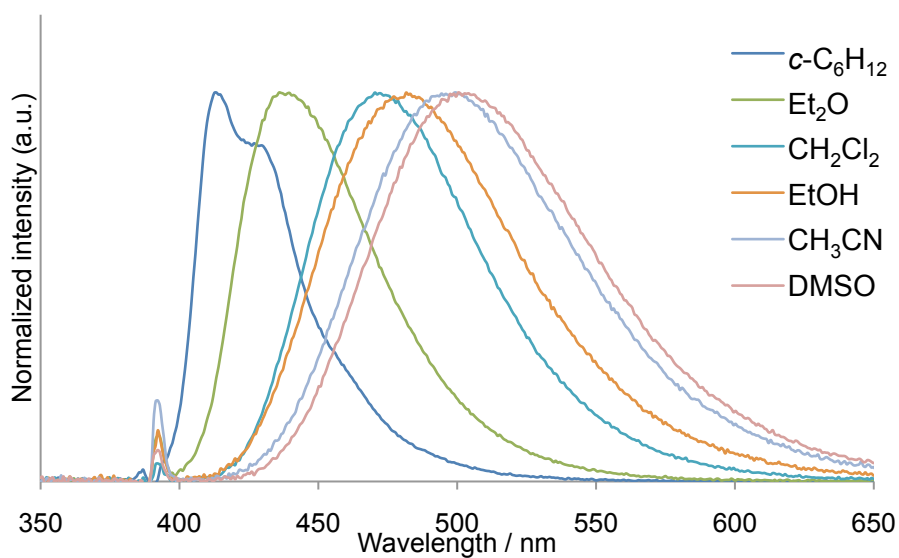

**Figure S12.** Fluorescence spectra of 3b in various solvents ( $\lambda_{\text{ex}} = 390 \text{ nm}$ ).

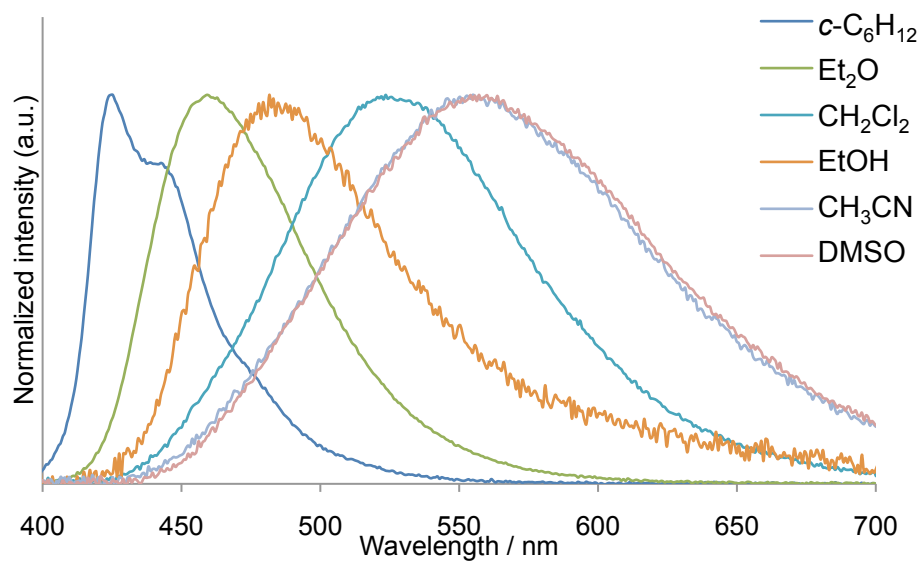

**Figure S13.** Fluorescence spectra of 4b in various solvents ( $\lambda_{\text{ex}} = 390 \text{ nm}$ ).

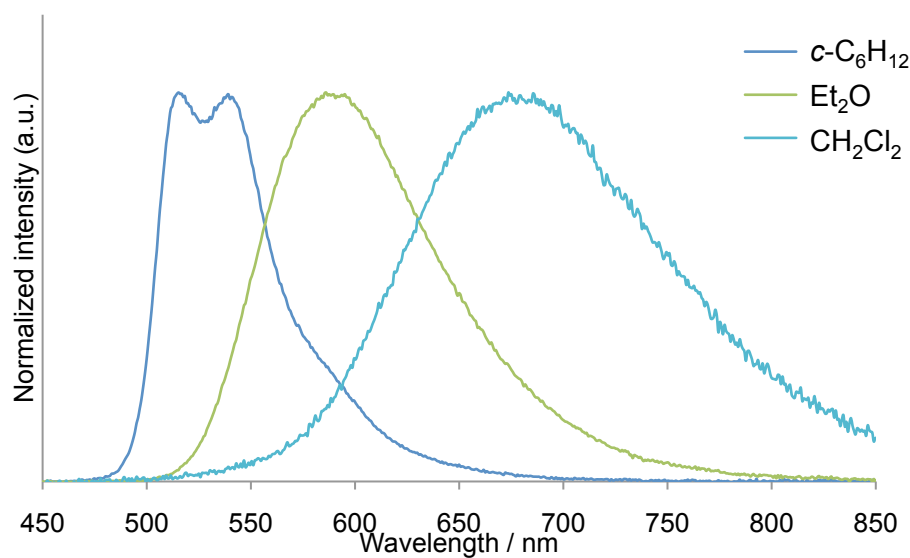

**Figure S14.** Fluorescence spectra of 5b in various solvents ( $\lambda_{\text{ex}} = 430 \text{ nm}$ ).

**Fluorescence Spectra of 1–5 in the Solid States**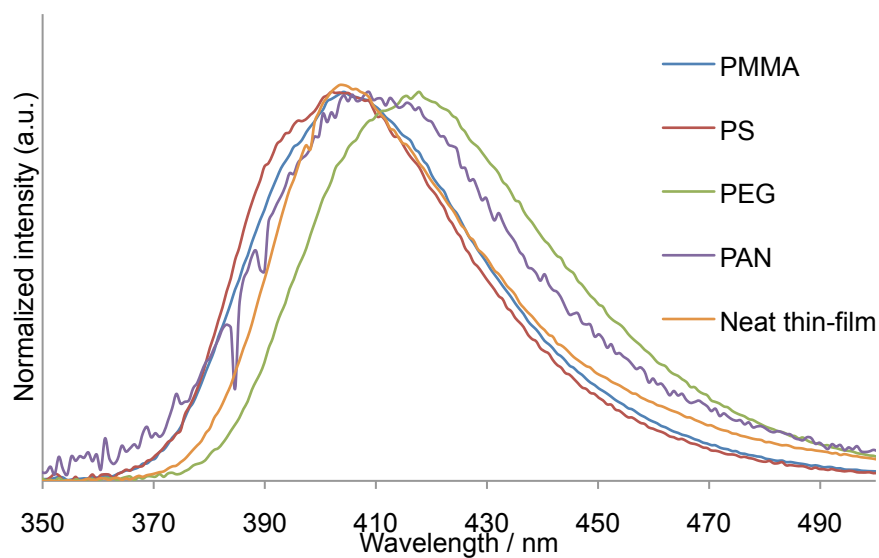

**Figure S15.** Fluorescence spectra of 1 in the solid states ( $\lambda_{\text{ex}} = 290$  nm).

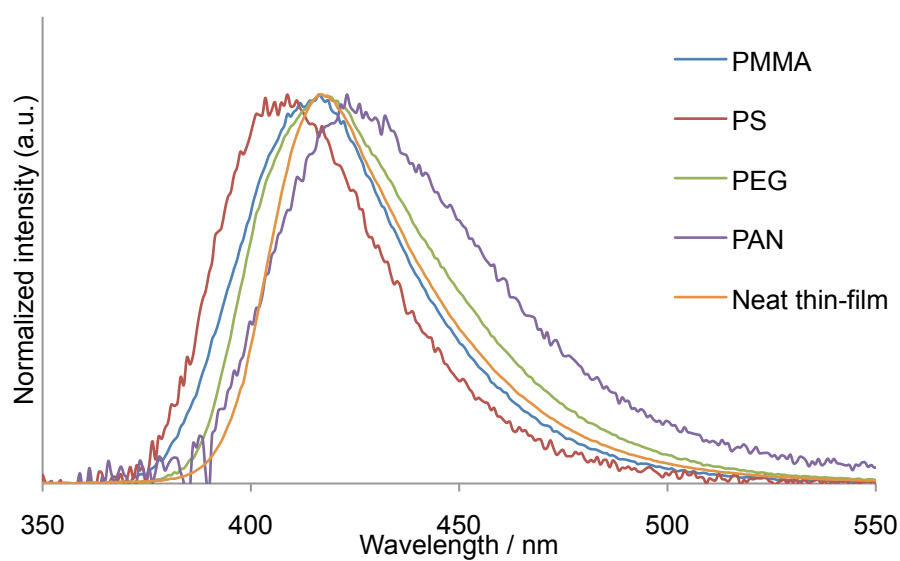

**Figure S16.** Fluorescence spectra of 2 in the solid states ( $\lambda_{\text{ex}} = 290$  nm).



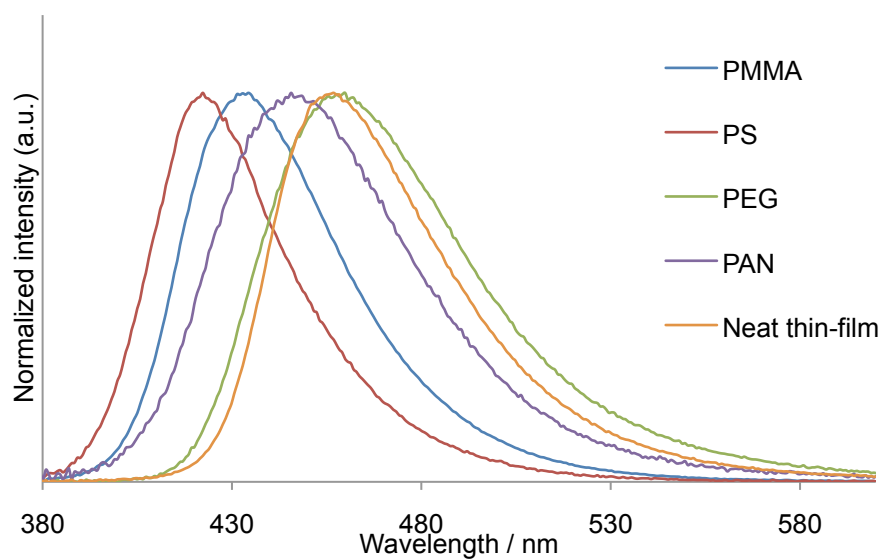

**Figure S17.** Fluorescence spectra of 3a in the solid states ( $\lambda_{\text{ex}} = 320$  nm).

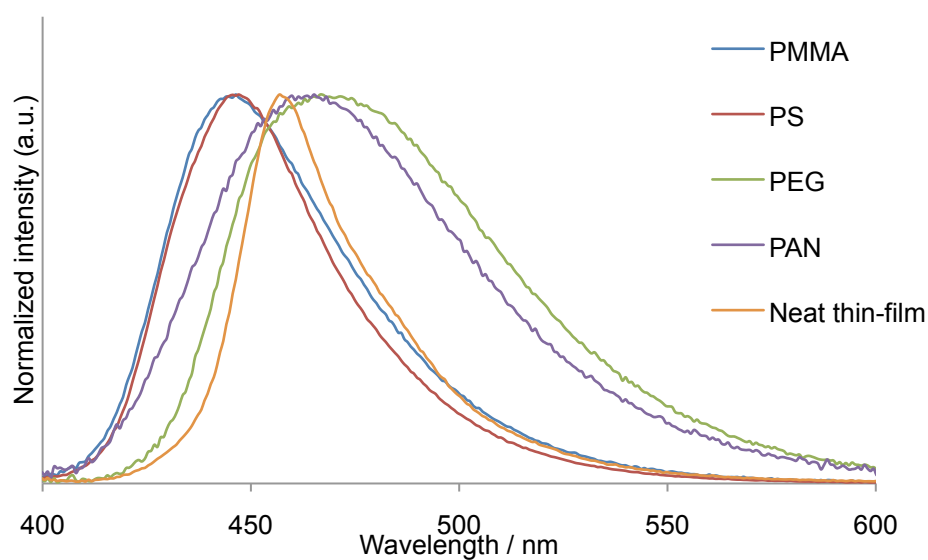

**Figure S18.** Fluorescence spectra of 3b in the solid states ( $\lambda_{\text{ex}} = 390$  nm).

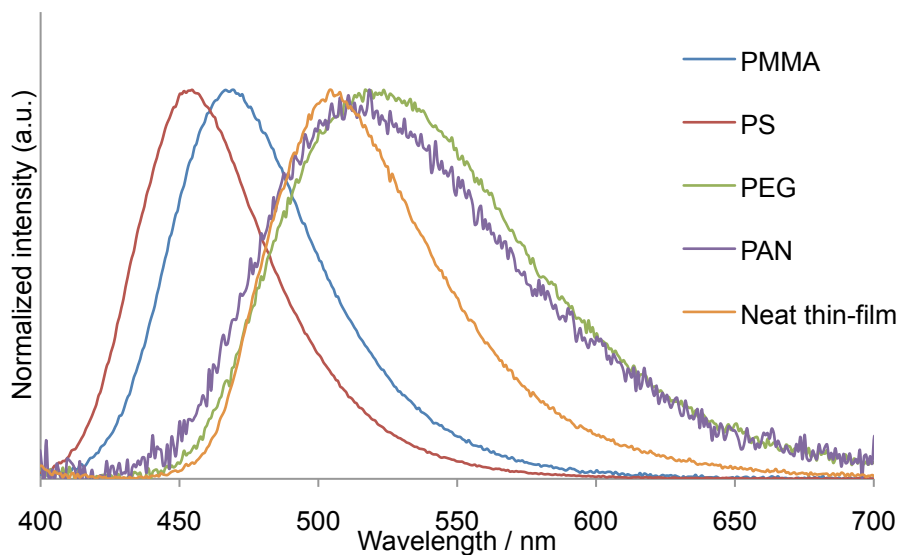

**Figure S19.** Fluorescence spectra of 4b in the solid states ( $\lambda_{\text{ex}} = 390$  nm).

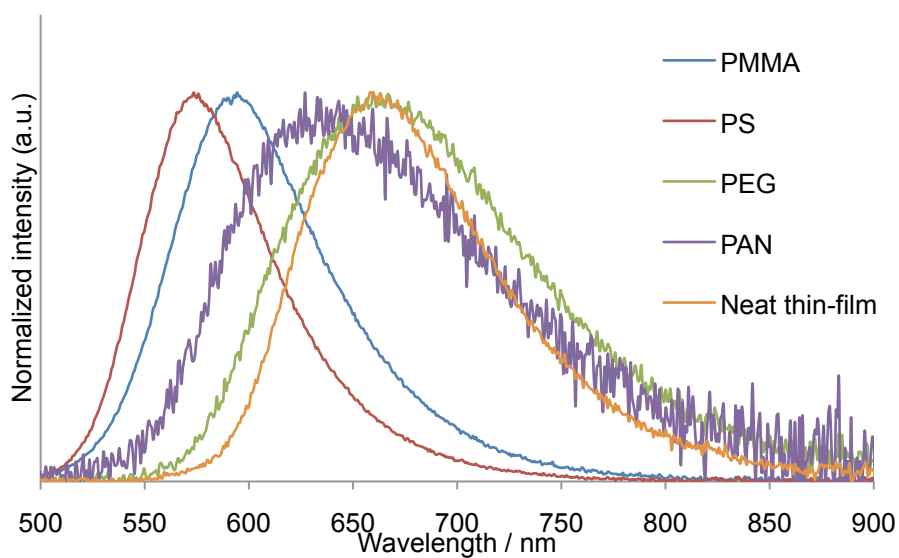

**Figure S20.** Fluorescence spectra of 5b in the solid states ( $\lambda_{\text{ex}} = 430$  nm).

**Photophysical Properties of Fluorenes 9–11 in Various Solvents (Spectra measured in benzene are omitted for clarity.)**

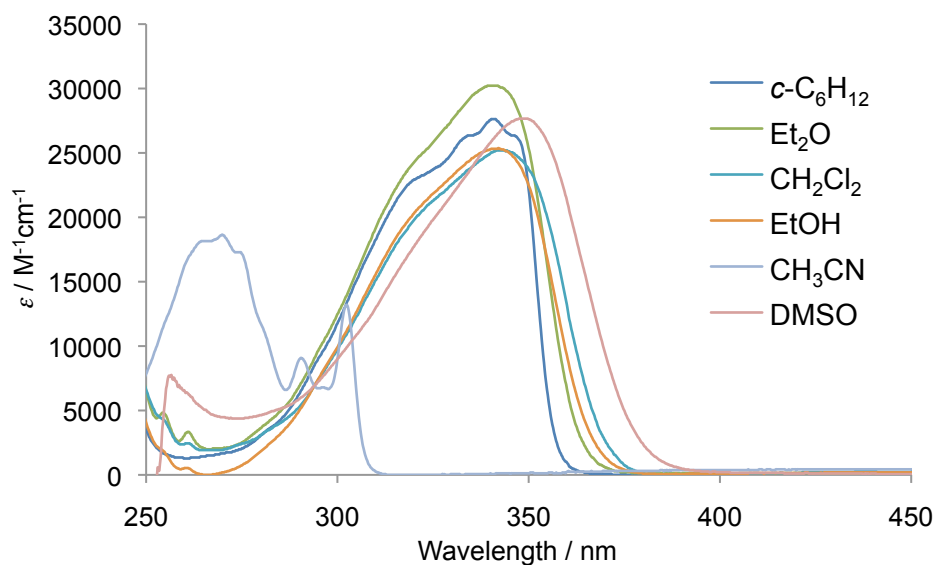

**Figure S21. UV absorption spectra of 9 in various solvents.**

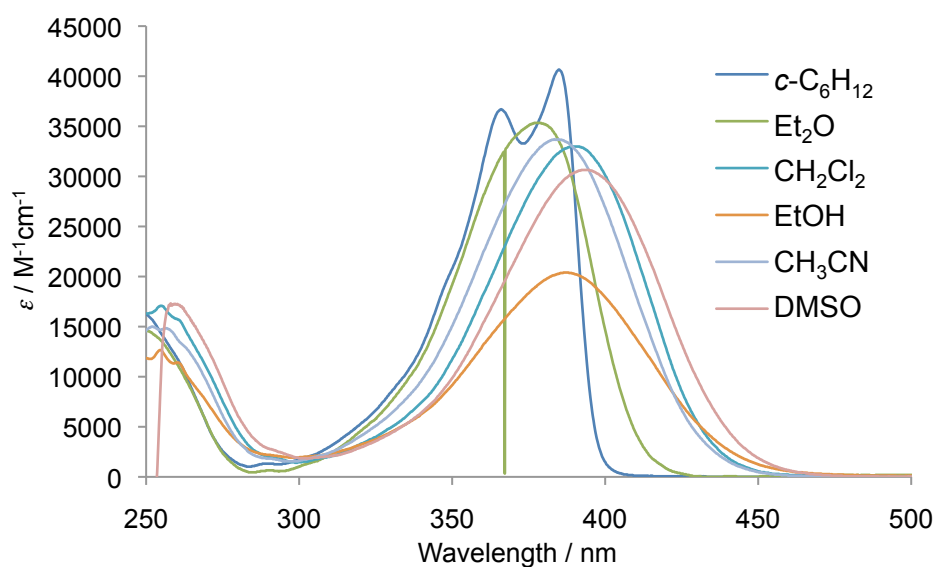

**Figure S22. UV absorption spectra of 10 in various solvents.**

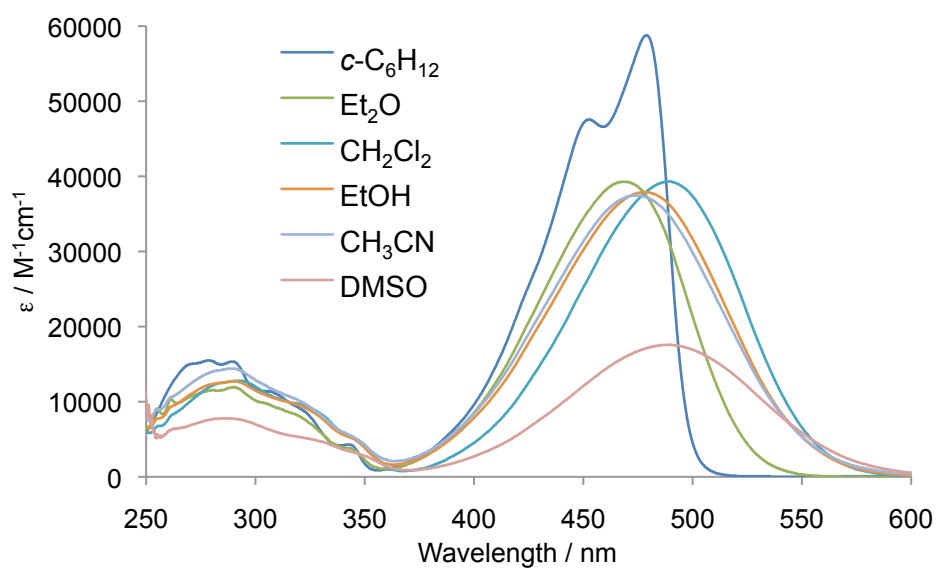

**Figure S23.** UV absorption spectra of 11 in various solvents.

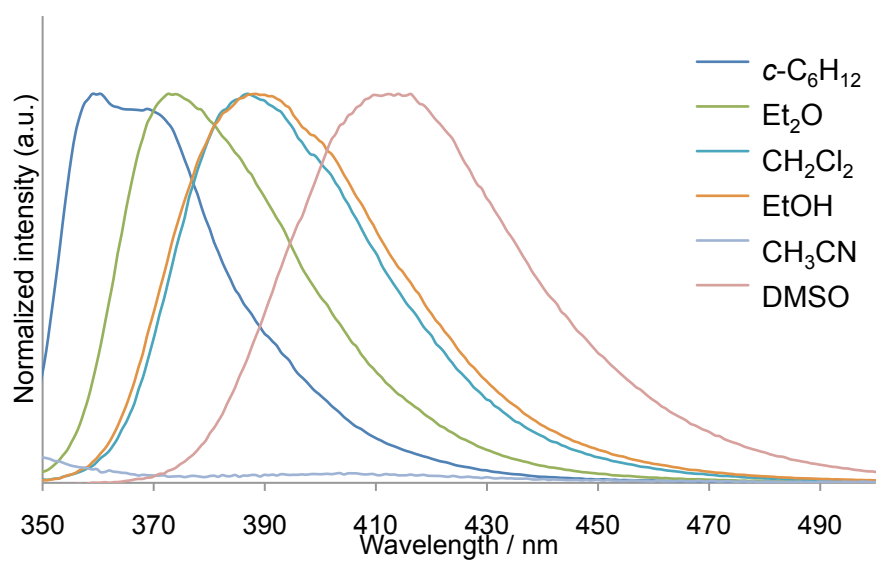

**Figure S24.** Fluorescence spectra of 9 in various solvents ( $\lambda_{\text{ex}} = 300 \text{ nm}$ ).

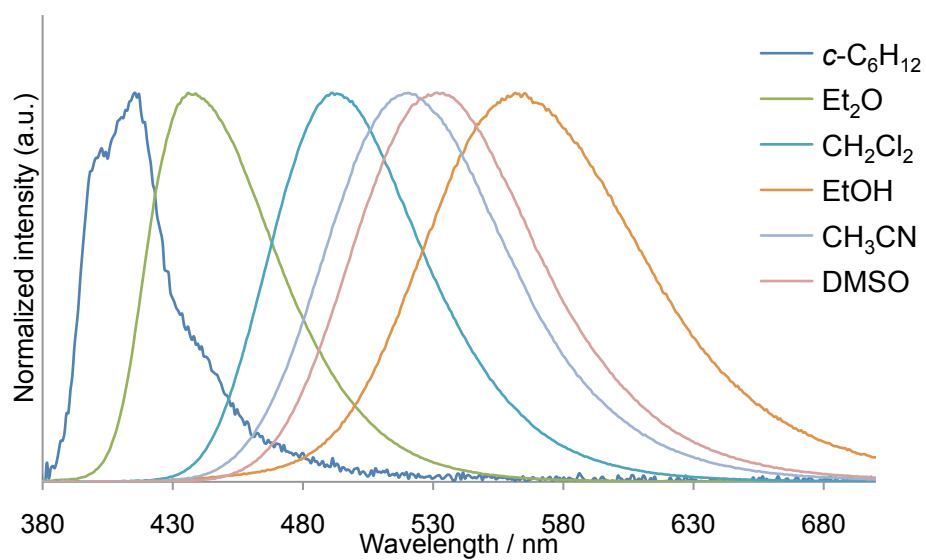

**Figure S25.** Fluorescence spectra of 10 in various solvents ( $\lambda_{\text{ex}} = 360 \text{ nm}$ ).

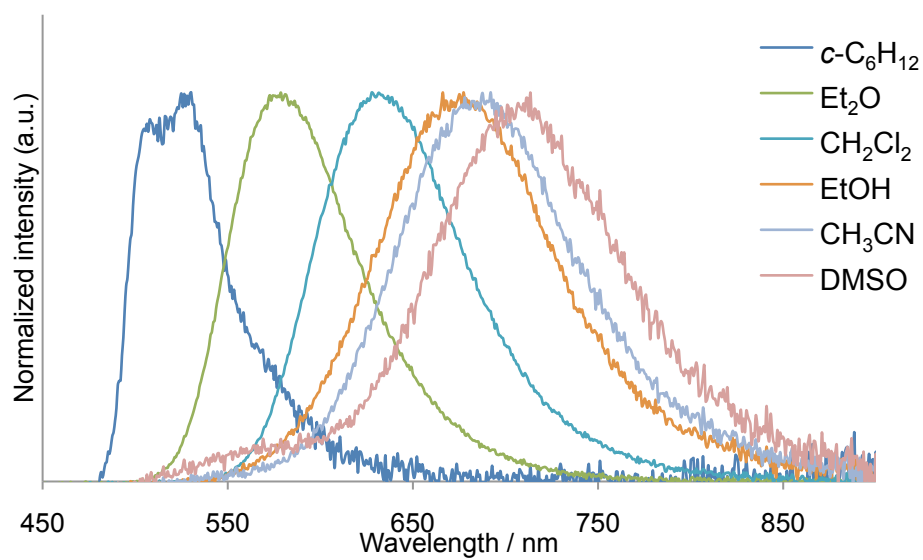

**Figure S26.** Fluorescence spectra of 11 in various solvents ( $\lambda_{\text{ex}} = 430 \text{ nm}$ ).
